# Supplementary material for: Global warming-induced Asian hydrological climate transition across the Miocene–Pliocene boundary
Source: PubMed Central journal article supplement (PMC8626456; doi:10.1038/s41467-021-27054-5), 2021-11-26
Supplement: 41467_2021_27054_MOESM3_ESM.pdf [file 41467_2021_27054_MOESM3_ESM.pdf]

### **Description of Additional Supplementary Files**

File Name: Supplementary Data 1

Description: Late Miocene-Pliocene summer monsoon proxy records
